# Supplementary material
Source: Research Square preprint supplement (doi:10.21203/rs.3.rs-9966269/v1)
Supplement: Supplementary file 1 [file 1e54fe2423ee151a4c07b4dd.xlsx]

## Sheet: Ibogaine Fatality Database 
Case #	Short reference	Year Publication	Other reference-same case	Year	Country	Age	Gender	Primary Indication	SUD?	Secondary Indication(s)	Setting	ECG-screen	Circumstances at Death	Time to Death (hours)	Ibogaine Form	Dose	Dose Standardized (mg/kg)	Other Toxicology	Cardiac Disease (Y/N)	Polysubstance Use (Y/N)	Alcohol/BZD Withdrawal Risk (Y/N)	Seizure activity	Official Cause of Death	Summary conclusion (Authors)	Primary Reference	Extra Reference or URL
1	Alper et al.	2012		1990	France	44	F	Psychological/Spiritual	0		Treatment setting		Became unresponsive during treatment	4	Ibogaine HCl	300 mg	4.5	Negative	Y	N	N		Acute heart failure	Ibogaine intoxication + cardiovascular disease	Alper, K. R., Stajić, M. & Gill, J. R. Fatalities Temporally Associated with the Ingestion of Ibogaine. J. Forensic Sci. 57, 398–412 (2012).
2	Alper et al.	2012	Alper et al (1999)	1993	The Netherlands	24	F	Opioid detoxification	1		Treatment setting		Died during treatment, gurgling sounds	19	Ibogaine HCl	29 mg/kg	29	Morphine 'trace'	N	Y	N		Undetermined	Combined ibogaine + morphine intoxication	Alper, K. R., Stajić, M. & Gill, J. R. Fatalities Temporally Associated with the Ingestion of Ibogaine. J. Forensic Sci. 57, 398–412 (2012).
3	Alper et al.	2012	Marker & Stajic (2002)	1999	USA	36	M	Opioid detoxification	1	Cocaine dependence	Home (self-administered)		Found dead, syringe present	9	Ibogaine HCl	~16–20 mg/kg	18	Opiates, cocaine	N	Y	N		Acute intoxication	Acute intoxication due to combined Ibogaine + opiates + cocaine	Alper, K. R., Stajić, M. & Gill, J. R. Fatalities Temporally Associated with the Ingestion of Ibogaine. J. Forensic Sci. 57, 398–412 (2012).
4	Alper et al.	2012	Also in Corkery 2018	2000	UK	40	M	Opioid detoxification	1	Hepatitis C	Undergound (ex-drug counsellor)		Vomited prior to death, collapsed in the toilet	40	Iboga alkaloid extract	6 g total		Negative	N	N	N		Fatal reaction to iboga aggravated by liver damage	Acute ibogaine intoxication	Alper, K. R., Stajić, M. & Gill, J. R. Fatalities Temporally Associated with the Ingestion of Ibogaine. J. Forensic Sci. 57, 398–412 (2012).
5	Alper et al.	2012		2002	Germany	35	F	Psychological/Spiritual	0				Found dead in bed	1.5	Ibogaine HCl	500 mg	8	Unknown	Y	Unknown	N		Heart failure/intoxication	Acute Ibogaine intoxication + artherosclerotic cardiovascular disease	Alper, K. R., Stajić, M. & Gill, J. R. Fatalities Temporally Associated with the Ingestion of Ibogaine. J. Forensic Sci. 57, 398–412 (2012).
6	Alper et al.	2012		2003	USA	32	M	Opioid detoxification	1		Home (self-administered)		Found dead in bed		Root bark or alkaloid extract	0.95 mg/L Cardiac		Cocaine, methadon, Benzo	Y	Y	N		Ibogaine intoxication	Acute Ibogaine intoxication + cardiovascular disease + cocaine abuse	Alper, K. R., Stajić, M. & Gill, J. R. Fatalities Temporally Associated with the Ingestion of Ibogaine. J. Forensic Sci. 57, 398–412 (2012).
7	Alper et al.	2012		2003	Mexico	54	M	Opioid detoxification	1	Alcohol dependence	Clinic		Died at treatment facility	60	Ibogaine HCl	13 mg/kg	13	Unknown	Y	Unknown	Y		Pulmonary thromboembolism	Insufficient information	Alper, K. R., Stajić, M. & Gill, J. R. Fatalities Temporally Associated with the Ingestion of Ibogaine. J. Forensic Sci. 57, 398–412 (2012).
8	Alper et al.	2012		2004	Mexico	45	M	Opioid detoxification	1	Alcohol dependence	Clinic		Died at treatment facility	20	Ibogaine HCl	15 mg/kg	15	Unknown	N	Unknown	Y		Hemorrhagic pancreatitis	Acute hemorrhagic pancreatitis (during ibogaine tx) complicating alcoholism	Alper, K. R., Stajić, M. & Gill, J. R. Fatalities Temporally Associated with the Ingestion of Ibogaine. J. Forensic Sci. 57, 398–412 (2012).
9	Alper et al.	2012		2005	Mexico	48	F	Opioid detoxification	1		Clinic		Sudden death during treatment	48	Ibogaine HCl	14 mg/kg	14	Benzodiazepines	Y	Y	N		Sudden cardiac death	Acute myocardial infarction due to coronary artery atherosclerosis during ibogaine therapy	Alper, K. R., Stajić, M. & Gill, J. R. Fatalities Temporally Associated with the Ingestion of Ibogaine. J. Forensic Sci. 57, 398–412 (2012).
10	Alper et al.	2012		2005	USA	43	M	Opioid detoxification	1	Alcohol dependence	Home (self-administered)		Witnessed seizure and cardiac arrest	27	Ibogaine HCl	2.8 mg/L (Blood)		Benzodiazepines, cocaine	Y	Y	Y	Seizure after 17 hrs.	Vavular heart disease, cardiomyopathy	Ibogaine intoxication + cardiomyopathy	Alper, K. R., Stajić, M. & Gill, J. R. Fatalities Temporally Associated with the Ingestion of Ibogaine. J. Forensic Sci. 57, 398–412 (2012).
11	Alper et al.	2012		2005	Mexico	51	M	Opioid detoxification	1	Methamphetamine, alcohol dependence	Clinic		Died at facility	24	Ibogaine HCl	12 mg/kg	12	Unknown	Unknown	Unknown	Y		Cardiorespiratory arrest	Insufficient information	Alper, K. R., Stajić, M. & Gill, J. R. Fatalities Temporally Associated with the Ingestion of Ibogaine. J. Forensic Sci. 57, 398–412 (2012).
20	Corkery	2018		2005	UK	36	M	Opioid detoxification	1		Clinic		Managed to consume opiates which led to his collapse and death	18	Ibogaine	0.8 mg/mL (Blood)		Opiates, Benzo, THC		Y	N		ibogaine and opiate intoxication	ibogaine and opiate intoxication	Corkery, J. M. Ibogaine as a treatment for substance misuse: Potential benefits and practical dangers. Prog. Brain Res. 242, 217–257 (2018).
12	Alper et al.	2012		2006	Mexico	38	M	Opioid detoxification	1		Clinic		Found dead in room	12	Ibogaine HCl	13 mg/kg	13	Cocaine, morphine	Unknown	Y	N		Pulmonary thromboembolism	Insufficient information	Alper, K. R., Stajić, M. & Gill, J. R. Fatalities Temporally Associated with the Ingestion of Ibogaine. J. Forensic Sci. 57, 398–412 (2012).
13	Alper et al.	2012	Kontrimavičiūtė et al (2006)	2006	France	48	M	Unknown			Ritual/spiritual		Ingested root bark, vomiting, dyspnea	53	Root bark (18 soup spoons)	6.6 mg/L Vena cava		Negative	N	N	N		pulmonary edema due to drug overdose by ingestion of Tabernanthe iboga root bark	Ibogaine intoxication	Violeta Kontrimavičiūtė, Olivier Mathieu, Jean-Claude Mathieu-Daudé, Paulius Vainauskas, Thierry Casper, Eric Baccino, Françoise M.M. Bressolle, Distribution of Ibogaine and Noribogaine in a Man Following a Poisoning Involving Root Bark of the Tabernanthe iboga Shrub, Journal of Analytical Toxicology, Volume 30, Issue 7, September 2006, Pages 434–440, https://doi.org/10.1093/jat/30.7.434
14	Alper et al.	2012		2006	The Netherlands	28	M	Opioid detoxification	1	Undisclosed brain tumor	Underground		Fluctuating levels of consciousness post bath	76	Alkaloid extract	7.5 g		Cannabinoids	N	Unknown	N		Inconclusive	Hemorrhagic complications of duodenal ulcer; also suffered from an undisclosed braintumor	Alper, K. R., Stajić, M. & Gill, J. R. Fatalities Temporally Associated with the Ingestion of Ibogaine. J. Forensic Sci. 57, 398–412 (2012).
15	Alper et al.	2012		2006	South Africa	30	M	Opioid detoxification	1		Clinic		Respiratory collapse, died en route to hospital	8	Ibogaine HCl	17 mg/kg	17	Unknown	Unknown	Unknown	N		Cardiorespiratory collapse	Insufficient information	Alper, K. R., Stajić, M. & Gill, J. R. Fatalities Temporally Associated with the Ingestion of Ibogaine. J. Forensic Sci. 57, 398–412 (2012).
16	Alper et al.	2012	Mazoyer et al (2013)	2006	France	27	M	Substance dependence	1		Spiritual center		Found dead in meditation room	12	>20 gr Root bark	0.65 mg/L (Blood)		Methadone, benzodiazepines	N	Y	Y		Ibogaine and benzo drug overdose	Combined drug intoxication Ibogaine, Methadone & Diazepam	Alper, K. R., Stajić, M. & Gill, J. R. Fatalities Temporally Associated with the Ingestion of Ibogaine. J. Forensic Sci. 57, 398–412 (2012).
17	Alper et al.	2012		2006	USA	45	M	Opioid detoxification	1		Home		Found dead in bed	10	Ibogaine HCl	22 mg/kg	22	Fentanyl, benzodiazepines	N	Y	N		Mixed drug intoxication	Combined drug intoxication (Ibogaine, fentanyl & diazepam)	Alper, K. R., Stajić, M. & Gill, J. R. Fatalities Temporally Associated with the Ingestion of Ibogaine. J. Forensic Sci. 57, 398–412 (2012).
18	Alper et al.	2012		2007	Mexico	33	M	Opioid detoxification	1	Crack cocaine dependence	Clinic		Collapsed at facility	6.5	Ibogaine HCl	11 mg/kg	11	Unknown	Unknown	Unknown	N		Pulmonary thromboembolism	Insufficient information	Alper, K. R., Stajić, M. & Gill, J. R. Fatalities Temporally Associated with the Ingestion of Ibogaine. J. Forensic Sci. 57, 398–412 (2012).
19	Alper et al.	2012		2007	Mexico	41	M	Opioid detoxification	1	Cocaine dependence	Clinic		Developed dyspnea during treatment	6	Ibogaine HCl	13 mg/kg	13	Unknown	Y	Unknown	N		Fatal arrhythmia with cardiac hypertrophy	Ibogaine intoxication + cardiac hypertrophy	Alper, K. R., Stajić, M. & Gill, J. R. Fatalities Temporally Associated with the Ingestion of Ibogaine. J. Forensic Sci. 57, 398–412 (2012).
21	Corkery	2018		2009	Mexico	60	F	Methadone	1	Hepatitis B & Thyroid condition	Clinic		Died during treatment		Ibogaine	Unknown		Unknown	Unknown	Unknown	Unknown		Unknown	Unknown	Corkery, J. M. Ibogaine as a treatment for substance misuse: Potential benefits and practical dangers. Prog. Brain Res. 242, 217–257 (2018).
22	Corkery	2018		2009	UK	50	M	Opioid detoxification	1	alcoholic and diazepam dependent	Clinic		was not well on arrival and remained in that condition during the following 24h, and was found unresponsive in the early hours of the following day	24-48	Ibogaine	Unknown		tryptamine, oxycodone and mirtazapine	Unknown	Y	Y		toxic effects of drugs (including iboga and heroin) and alcohol, taken both shortly before death and over a period of years		Corkery, J. M. Ibogaine as a treatment for substance misuse: Potential benefits and practical dangers. Prog. Brain Res. 242, 217–257 (2018).
23	Corkery	2018	Black (2011) / Newenham (2011)	2010	Cameroon	32	F	Spiritual / ritual	0		Ritual		Spiritual initiation ceremony		Iboga root bark	0.4 mg/L (Blood)		None	Unknown	N	N		Cardiac arrest	Iboga-associated cardiac arrest	Corkery, J. M. Ibogaine as a treatment for substance misuse: Potential benefits and practical dangers. Prog. Brain Res. 242, 217–257 (2018).
24	Corkery	2018	Jalal et al (2012) / Bronstein et al (2012)	2012	USA	25	M	Opioid detoxification	1	supraventricular tachycardia	Home		respiratory difficulty followed by cardiopulmonary arrest; the patient expired after 2 days from multi‐organ failure.	48	Ibogaine capsules	2.5 gram Ibogaine		Unknown	Y	N	N	Seizure activity on EEG	Multiorgan failure	Ibogaine intoxication and pre-existing heart condition	Corkery, J. M. Ibogaine as a treatment for substance misuse: Potential benefits and practical dangers. Prog. Brain Res. 242, 217–257 (2018).
26	Corkery	2018	Stewart et al (2015) / Noler et al (2018)	2013	New Zealand	45	F	Opioid detoxification	1	Morbid Obese	Clinic	Yes	Found dead after treatment	15	Ibogaine	Multiple doses; 2220mg	22 mg/kg (assuming 100KG)	Opioids	Unknown	Unknown	Unknown		Suspected heart atack/death was very likely “related to ibogaine ingestion and most probably related to a cardiac arrhythmia; failed duty of care by the treatment provider (22).	Probable ibogaine-related cardiac event	Corkery, J. M. Ibogaine as a treatment for substance misuse: Potential benefits and practical dangers. Prog. Brain Res. 242, 217–257 (2018).	Noller, G. E., Frampton, C. M. & Yazar-Klosinski, B. Ibogaine treatment outcomes for opioid dependence from a twelve-month follow-up observational study. Am. J. Drug Alcohol Abus. 44, 37–46 (2018).
25	Corkery	2018	Papadodima et al (2013)	2013	Greece	52	M	Alcohol addicton	1	episode of hypokalemia and hypo-magnesemia; postmortem: Liver cirrhosis	Home		Suddenly died upon coming home after prescription in hotel; wife described him as 'hypotonic'	16:45:00	Silene capensis Plant extract (possibly combined with Ibogaine)	2 mg/L of blood		Unknown	Unknown	N	Y		cardiac, ibogaine-related death, on the ground of coronary disease and serious liver disease		Papadodima, S. A., Dona, A., Evaggelakos, C. I., Goutas, N. & Athanaselis, S. A. Ibogaine related sudden death: A case report. J. Forensic Leg. Med. 20, 809–811 (2013).
27	Corkery	2018	Amundsen (2015)	2014	Costa Rica	42	F	Opioid detoxification	1	Methadone	Clinic	Yes	Found dead in bed on day 3 after 2nd dose on day 2.		Ibogaine capsules	Unknown		None	Unknown	Unknown	N		Myocardial infarction	Ibogaine-associated Myocardial infarction	Corkery, J. M. Ibogaine as a treatment for substance misuse: Potential benefits and practical dangers. Prog. Brain Res. 242, 217–257 (2018).
28	Corkery	2018	Cheer (2015)	2014	Thailand	33	M	Methamphetamine detoxification	1	Undiagnosed heart problem (post-mortem)	Clinic		Respiratory distress after 2nd dose on day 2 with Valium		Ibogaine	Multiple doses		Benzodiazepines	Y	Unknown	N		Cardiac arrest	Ibogaine-related cardiac arrest	Corkery, J. M. Ibogaine as a treatment for substance misuse: Potential benefits and practical dangers. Prog. Brain Res. 242, 217–257 (2018).		https://coconuts.co/bangkok/news/australian-man-died-while-koh-phangan-ibogaine-treatment-paper-reports/
29	Corkery	2018		2014	UK	53	M	Opioid detoxification	1		Home		ex-partner visited him the day before he was found dead, finding him in bed and unwell. The following day she visited the deceased’s home, gaining access via an unlocked door and found him dead in bed.	24-48	Ibogaine powder	3mg/dL		Morphine, cocaine	Y	Y	N		acetone and ibogaine overdose	myocardium showed mild dilation of the left ventricle	Corkery, J. M. Ibogaine as a treatment for substance misuse: Potential benefits and practical dangers. Prog. Brain Res. 242, 217–257 (2018).	https://www.dailymail.co.uk/news/article-2994120/Former-stripper-helped-run-treatment-centre-Australian-Brodie-Smith-died-using-miracle-drug-addiction-cure-arrested-Thailand-killing-man-car-accident.html
30	Corkery	2018	Carr (2017)	2015	UK	36	M	Opioid detoxification	1		Clinic		After 30 hrs became ill and suffered a cardiac arrest (had earlier seizure)	30	Ibogaine			Morphine, heroin, cocaine	N	Y	N	Seizure hours before fatality	combined effects of morphine and ibogaine intoxication		Corkery, J. M. Ibogaine as a treatment for substance misuse: Potential benefits and practical dangers. Prog. Brain Res. 242, 217–257 (2018).
32	Corkery	2018	Gummin (2017)	2016	USA	26	M	Opioid detoxification	1	Polysubstance	Home		Seizure followed by multiple cardiac arrests, brain dead after 14 days	48	Ibogaine	Unknown		Benzodiazepines	N	Y	N	Suspected seizure after 48 hrs.	Anoxic brain injury	Ibogaine-induced cardiotoxicity	Corkery, J. M. Ibogaine as a treatment for substance misuse: Potential benefits and practical dangers. Prog. Brain Res. 242, 217–257 (2018).
31	Corkery	2018	Meisner et al (2016)	2016	USA	40	M	Opioid detoxification	1	mild liver enzyme abnormalities	Home		found down at home, unresponsive for an unknown period of time 8 hrs after ingestion	8 to unresponsive	Ibogaine + 2 gr 'Booster'	4 gr.		Negative	N	N	N		ibogaine induced cardiotoxicity and ibogaine-induced cardiac arrest	ibogaine induced cardiotoxicity and ibogaine-induced cardiac arrest	Meisner, J. A., Wilcox, S. R. & Richards, J. B. Ibogaine-associated cardiac arrest and death: case report and review of the literature. Ther. Adv. Psychopharmacol. 6, 95–98 (2016).
33	Aćimović	2021		2021	Serbia	27	M	Opioid detoxification	1		Home/Underground		Cause and manner of death were not established.	5-12 hrs	A powder labeled T. iboga bought online	3.6mg/L		Morphine, Codeine	N	N			Fatal ibogaine poisoning	histological analyses showed organ damage frequently associated with long-term drug abuse, predominantly to the heart, lungs and liver.	Aćimović, T. et al. Death due to consumption of ibogaine: case report. Forensic Sci., Med. Pathol. 17, 126–129 (2021).
	Grey literature
Case #	Short reference	Year Publication		Year	Country	Age	Gender						Summary												URL_1	URL_2
34	Andreas Tresch (Swiss)	2019		2011	The Netherlands	28	M	Opioid detoxification (Codeine)	1	Alcohol addiction	Underground	No	Man left alone in hotel room during Ibogaine trip, in panic ran on the highway and got hit by a car										Hit by a car while under Ibogaine		https://www.vn.nl/de-heks-van-kockengen	https://www.prosecutionservice.nl/latest/news/2019/03/12/ten-years-imprisonment-for-fatal-treatment-with-ibogaine
35	Zack	2013		2013	US/Costa Rica						Clinic		Heart stopped during Ibogaine trip while halucinating	3 hrs											https://www.youtube.com/watch?v=q0VUywn3yZU&t=7153s	https://www.ecstaticintegration.org/p/can-costa-ricas-psychedelic-wild
36	Bente Solberg	2014		2014	Costa Rica	41	F	Substance dependence	1		Clinic		Cardiac arrest.												https://www.vice.com/en/article/iboga-death-soul-centro-psychedelic-retreat-costa/
37	Sao Paulo	2016		2016	Brazil	29	M	Substance dependence	1		Underground/Clinic?												Cardiac arrest in a second ibogaine treatment that was done in a private clinic		https://www.cebrid.com.br/wp-content/uploads/2014/10/Boletim-PLANFAVI-38-Abril-Maio-Junho-2016.pdf?utm_source=chatgpt.com	https://akjournals.com/view/journals/2054/1/1/article-p10.xml
38	Milo Martinovic	2017		2017	Durban, South Africa	26	M	Opioid and Benzo detoxification	1		Clinic		Cardiac arrest: Alprazolam overdose; Instructed to continue taking the OxyContin and Xanax tablets	6 hrs						Y			Drug associated death consistent with Alprazolam overdose		https://iol.co.za/thepost/news/2024-04-23-dentist-charged-for-addicts-death/	https://www.rollingstone.com/culture/culture-features/ibogaine-pychedelic-benefits-dangers-death-1235079364/
39	Carmen Sirola (Swedish)	2019		2017	The Netherlands	48	F	Opioid detoxification	1		Underground	No	Found seizing on the ground, CPR unsuccesful; Concurrent use of antidepressant and methadone, not detoxed												https://www.kwakzalverij.nl/over-ons/symposia/symposium-2019/symposiumverslag-levensgevaarlijke-psychokwakzalverij/
40	Andy Haman (alias: Adam Powars)	2025		2021	USA	54	M	Alcohol addiction	1	Bodybuilder	Underground		Hours after Ibo was left alone, found in in a seizure and not breathing	3					Y	N		Yes	Ibogaine toxicity; enlarged heart and restricted blood flow in the arteries. Also, the coroner mentioned a number of other concerns from Haman's medical history. Most significantly, he had elbow surgery five days before the ibogaine session. The surgery was intended to combat an infection and he was septic.		https://www.cbsnews.com/colorado/news/ibogaine-ameen-alai-death-andy-haman-psychedelic-treatment/	https://www.cbsnews.com/colorado/news/westminster-man-indicted-distribution-controlled-substance-resulting-death/
41	David	2024		2022	Cancun, Mexico	49	M	Opioid detoxification	1		Clinic	Yes	Heavy Fentanyl use days prior to Iboga. Booster dose 2 days after flood dose, cardiac arrest	48 hrs											https://www.rollingstone.com/culture/culture-features/ibogaine-pychedelic-benefits-dangers-death-1235079364/	https://www.psychedelicstoday.com/2024/11/11/how-safe-is-ibogaine-therapy-the-delicate-balance-of-risk-and-efficacy/
42	Lauren Levis	2024		2024	Costa Rica	40	F	Addiction and depression	1		Clinic	Yes	Sat through 3/5 ceremonies and came back for 2nd time and suffered heart attack (after feeling dehydrated, requested IV drip but vein for IV could not be found).	<24 hrs.					N	N	N				https://www.vice.com/en/article/iboga-death-soul-centro-psychedelic-retreat-costa/
43	Blanka	2025		2024	Costa Rica	23	F					Yes	Ran off during Iboga trip ended up drownig in a river	Next day											https://medium.com/@AwakenYourSoul/death-at-awaken-your-soul-young-woman-tragically-dies-at-retreat-2318c82f0a12
44	Evans	2026		2025	Mexico	48	M	Opiod and Polysubstance abuse (Methadone)	1		Clinic	Yes	Slightly higher QTc; getting of methadon & oxycodon; arrythmia after 13 hrs. and after 15 hrs cardiac arrest; CPR/shock only brought back for minutes, not succesful	15 hrs	Ibogaine HCl	14 mg/kg	14		Y	Y	N		Cardiac arrest	Had prior Ibogaine without issues	https://www.ecstaticintegration.org/p/learning-from-ibogaine-fatalities
45	Baja-Mexico	2026		2026	Mexico	45	M	Opioid detoxification	1		Clinic	Yes	Became unresponsive during treatment	9	Ibogaine HCl	15				Y	N		Intoxication by chemical substances, to be determined (fentanyl)	Acute ibogaine intoxication	https://www.ambio.life/blog/patient-safety-transparency-and-revisions-to-detox-protocols
	Newly Added cases (Arns, Shinozuka & Barsuglia)
46	Arns, Sinozuka & Barsuglia	2026		2023	Portugal		M	Opioid detoxification	1		Clinic	Yes	Treatment uneventful, however patient had hidden drugs in the car and used during ibogaine												Arns, Sinozuka & Barsuglia
47	Arns, Sinozuka & Barsuglia	2026		2024	Mexico	45	M	Opioid detoxification	1	Methamphetamine dependence	Clinic	Yes	Collapsed at facility	39	Ibogaine HCl	15			N	Y	N		Acute Pulmonary Edema and non-traumatic Pancreatitis due to substance abuse.	Ibogaine intoxication + acute pancreatitits	Arns, Sinozuka & Barsuglia
48	Arns, Sinozuka & Barsuglia	2026			Mexico			Opioid detoxification	1		Clinic	Yes													Arns, Sinozuka & Barsuglia
	Corrections to original paper in RED
