# Supplementary material
Source: Research Square preprint supplement (doi:10.21203/rs.3.rs-9966269/v1)
Supplement: Supplementary file 1 [file 50e4504e58e4ca3ff1a7f81c.docx]

**Appendix 1: Supplementary material**

**Supplementary Methods: Multisite inventory study**

**Clinic Recruitment and Participation**

An initial list of ibogaine treatment clinics was compiled based on domain knowledge and expanded through additional outreach. Clinics were invited via email to participate in a retrospective data inventory.

Of 16 clinics contacted:

- 11 agreed to participate,
- 4 did not respond,
- and 1 was unreachable.

Participating clinics provided data voluntarily under mutual non-disclosure agreements with author MA. No financial incentives were provided.

**IBO-SAFE Assessment**

Clinic adherence to the Global Ibogaine Safety Guidelines10  was evaluated using a structured checklist (Ibogaine Safety Assessment For Excellence: IBO-SAFE score: Appendix 2), administered during site visits or online meetings as a structured interview.

The checklist assessed key domains including:

- informed consent procedures,
- medical supervision,
- cardiac monitoring,
- pre-treatment screening (ECG, laboratory testing),
- exclusion criteria,
- and emergency preparedness.

Scores were normalized to a 0–10 scale, with higher scores indicating greater adherence.

**Data Collection Procedures**

Clinics were asked to extract data from internal records for the period 2016–2026 (or earlier where available). Data were reported in aggregated form and included:

- total number of treated patients (unique individuals),
- number of deaths within 72 hours after ibogaine administration,
- number of seizures within 72 hours,
- proportion of SUD versus non-SUD indications,
- and summary descriptions of serious adverse events.

Fatalities were reported based on clinic records and internal review procedures. No external verification or adjudication was performed.

**Seizure Outcome**

Seizures were defined as any clinically observed seizure occurring during or within 72 hours after ibogaine administration.

Reported seizure cases were accompanied by brief contextual descriptions when available, including potential contributing factors.

**Supplementary methods: Systematic Review**

**Search Strategy and Case Identification**

To extend previously published fatality inventories 8,9, systematic searches were conducted in PubMed using the keywords “ibogaine,” “iboga,” “fatality,” and “death.” Searches included all records available up to April 9, 2026 and yielded 67 records, of which 24 since the Corkery 9  publication.

In addition, structured searches of grey literature were performed using publicly accessible online sources such as Google, including media reports, legal documents, and other non-indexed materials. To enhance coverage of non-English sources, supplementary search strategies were applied using multilingual queries across major world languages. All obtained sources were screened for further references to other sources or literature (e.g. cross-checking reference lists).

All identified cases were screened for relevance based on the presence of reported ibogaine exposure and death occurring within 72 hours. No restrictions were applied with respect to geographic location, treatment context (clinical or non-clinical), or causal attribution.

**De-duplication and Cross-Referencing**

Given the heterogeneous nature of sources, extensive de-duplication procedures were performed. Cases were cross-referenced across:

- previously published inventories 8,9,
- bibliographic databases,
- grey literature sources,
- and the IbogaineVault database 17, a curated repository of approximately 290 ibogaine-related publications and documents (1957–2026).

Potential duplicates were resolved by comparing demographic characteristics, dates, locations, and narrative descriptions of events. Where multiple reports referred to the same case, all sources were retained for documentation but counted as a single event. Updates made to prior cases from Alper8  and Corkery9  are marked in red in Appendix 3.

**Definition of Ibogaine-Associated Fatality**

A fatality was defined as any death occurring during or within 72 hours following ibogaine administration, regardless of causal attribution.

This definition was selected to align with:

- prior literature8 ,
- and clinical monitoring practices outlined in the Global Ibogaine Safety Guidelines10 .

**Supplementary Search Procedures**

To reduce the likelihood of missed cases, additional exploratory search procedures were applied, including targeted queries designed to identify reports in non-indexed or non-English sources. These approaches were used as a complement to standard database and grey literature searches.

**Google Trends Data Extraction**

To contextualize temporal patterns in reported fatalities, public interest in ibogaine was estimated using Google Trends (https://trends.google.com).

Search terms included “ibogaine” or “iboga.” Data were extracted for the period 2004–2026. Google Trends provides normalized search interest indices scaled from 0 to 100, representing relative search volume over time.

Annual fatality counts were aligned with corresponding yearly search indices for correlation analyses.

**Supplementary Results**

**Additional Fatality Cases Identified**

In addition to the 32 cases previously reported 8,9, 16 new cases were identified:

- 1 case from the peer-reviewed literature23,
- 12 cases from grey literature sources,
- 3 cases from participating clinics (after de-duplication).

Note that Corkery9  initially reported 33 cases, but double-counted the Mazoyer24  case that was already included as case #16 in Alper8 .

This resulted in a total of 48 unique cases spanning 1990–2026.

A detailed overview of all cases, including source attribution and cross-referencing, is provided in Appendix 3 and a live version that will remain updated online at www.brainclinics.com/resources.

**Demographic and Clinical Characteristics**

Among cases with available data:

- Mean age: 39.4 years (range, 23–60),
- Sex: 34 male, 12 female (2 unknown),
- Indication: 42 of 45 cases involved SUD (3 unknown).

Ibogaine dose was reported in 15 cases, ranging from 4.5 to 29 mg per kilogram. The most commonly reported formulation was ibogaine hydrochloride.

**Circumstances of Death**

Reported contributing factors included:

- cardiotoxicity and cardiac arrhythmias,
- concurrent substance use,
- and behavioral disturbances (e.g., disorientation or impulsive actions preceding death).

Detailed case-level information is provided in Appendix 3.

**Seizures in the Clinical Cohort**

Across participating clinics, 6 seizures were reported among 19,071 treated patients, corresponding to a rate of 0.03%.

Reported contributing factors included:

- benzodiazepine withdrawal (5 cases),
- and pre-existing epilepsy (1 case).

In the latter case, treatment proceeded despite known contraindications due to clinical risk considerations.

**Supplementary Appendices**

- **Appendix 2**: IBO-SAFE Checklist
- **Appendix 3**: Full Ibogaine Fatality Database (case-level overview)

**Appendix 2: IBO-SAFE: Ibogaine Safety Assessment For Excellence**

| Items | Rubric | Score |
| --- | --- | --- |
| Medical screening | **2 points** for adequate informed consent and declaration of risks and benefit  **5 points** for ECG screen (**6 points** for 12-lead ECG)  1 point for echocardiogram, valium stress testing, or 24 holter monitor if there are abnormalities in ECG  **5 points** for complete metabolic panel (Chem 12 or 18), incl. at least electrolytes and liver function tests  1 point for complete blood count  1 point for complete thyroid function test  1 point for complete physical | /17 |
| Exclusion criteria | **5 points** for excluding QTc > 450 ms in males and QTc > 470 ms in females  **3 points** for excludingabnormal blood test results: ALT/AST/Bilirubine > 3-5x upper limit of normal (ULN)  1 point for excluding psychiatric/neurological conditions listed below*  1 point for excluding history of heart failure and active blood clots  1 point for excluding major respiratory conditions, such as low oxygen, emphysema, COPD, and cystic fibrosis  1 point for excluding chronic gastrointestinal issues, such as bleeding ulcer and leaky gut syndrome | /12 |
| Consideration of risk factors | **3 point** for considering cardiac risk factors listed below**  1 point for considering non-cardiac risk factors listed below***  1 point for correcting abnormal potassium or magnesium blood test results prior to Tx. | /5 |
| Opioids | **5 points** for ensuring ≤ 0.125 mg of residual buprenorphine and ≤ 2 mg of residual methadone based on half-life analysis (24hrs or 48), if applicable | /5 |
| Other drug interactions | **2 points** for urine analysis at intake to check for any substance/medication use  1 point for detox from alcohol dependency 5-7 days prior to ibogaine (min. 3 days), if applicable  1 point for requiring participants to abstain from prescription stimulants, methamphetamine, and caffeine five days prior to ibogaine, and from cocaine seven days prior to ibogaine, if applicable  1 point for stopping MAOIs 7 days before Tx, if applicable  1 point for tapering participants from corticosteroids, (anabolic) steroids and beta blockers prior to ibogaine, if applicable  1 point for considering switching from short-acting to longer-acting benzodiazepines. | /7 |
| Precautions taken immediately before ibogaine dosing | **5 points** for pre-treating participants with magnesium sulfate  **2 points** for inserting IV port  1 point for second ECG to confirm ECG results from screening  1 point for checking Objective Opioid Withdrawal scores, if applicable | /9 |
| Precautions taken during ibogaine dosing | **5 points** for continuous monitoring of participants’ respiratory and cardiac changes with 3-lead ECG 12-24 hours after ibogaine dose  **5 points** for using magnesium sulfate to control QTc during ibogaine treatment, if needed  **5 points** for supervision of participants with at least one ACLS trained staff member 12-24 hours after ibogaine dose  **2 points** for regular (at least once every 4 hr) cardiac monitoring 24-72 hours after ibogaine dose and at least one ACLS staff on call  1 point for rescue medication in the event of opioid overdose, oxygen saturation below 92%, bradycardia, and asthma attack | /18 |
|  |  | **Total:**  **/73** |

* Schizophrenia, bipolar disorder for which patient has been hospitalized or medicated, depersonalization and/or derealization disorder, cerebellar dysfunction, epilepsy, psychosis or acute confusional state.

** Borderline QTc interval (>430 ms for males and >450 ms for females), arrhythmias, childhood congenital heart defects, heart attack, murmur, family history of heart attack/sudden cardiac death before 50 years of age, major heart/vascular/pulmonary surgery i.e. transplant, Coronary Artery Bypass Grafting, artificial heart valves, childhood Coronary Heart Disease, surgeries, internal or external pacemaker, history of blood clots, abnormal Heart Rate/Rhythm (resting heart rate of ≥120 beats per minute or higher or ≤50 beats per minute), high/low blood pressure (170/105 or higher or 90/60 or lower, while not taking blood pressure medication)

*** No accessible veins for IV port access, irregular thyroid, sleep apnea, abnormal CMC/CMP, constipation or impaction, obesity, eating disorders, malnutrition, Crohn’s disease, irritable bowel syndrome, biverticulosis, biverticulitis, chronic infectious diseases, overdose history, history of head trauma
